# Supplementary material for: Allele-specific repression of Sox2 through the long non-coding RNA Sox2ot
Source: PubMed Central journal article supplement (PMC5762901; doi:10.1038/s41598-017-18649-4), 2018-01-10
Supplement: 41598_2017_18649_MOESM1_ESM.pdf [file 41598_2017_18649_MOESM1_ESM.pdf]

# **Allele-specific repression of Sox2 through the long non-coding RNA Sox2ot**

Tobias C. Messemaker<sup>1,2</sup>, Selina M. van Leeuwen<sup>1</sup>, Patrick van den Berg<sup>3</sup>, Anke E.J. 't Jong<sup>1</sup>, Robert-Jan Palstra<sup>4</sup>, Rob C. Hoeben<sup>1</sup>, Stefan Semrau<sup>3</sup> and Harald M.M. Mikkers<sup>1</sup>

**Supplementary Figure 1S plus legends**

**Supplementary Figure 2S plus legends**

**Supplementary Figure 3S plus legends**

**Supplementary Figure 4S plus legends**

**Supplementary Figure 5S plus legends**

**Supplementary Table 1S**

**Supplementary methods info**

# Supplementary Figure S1

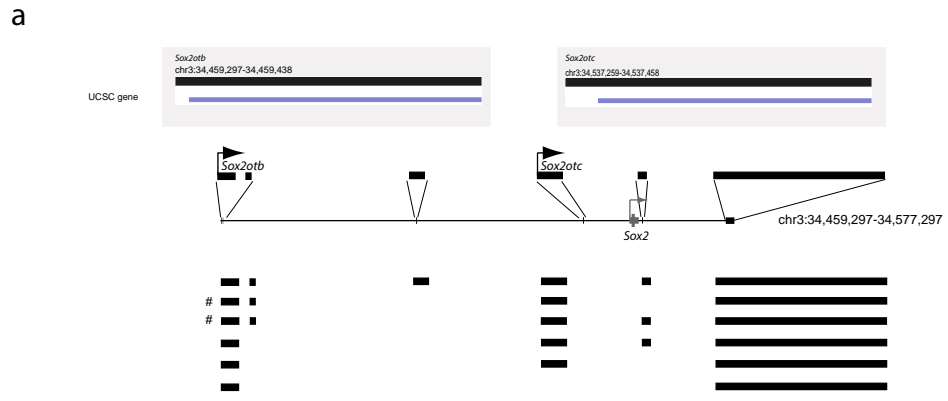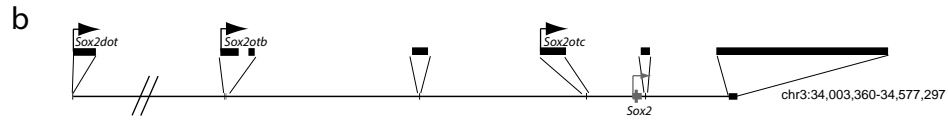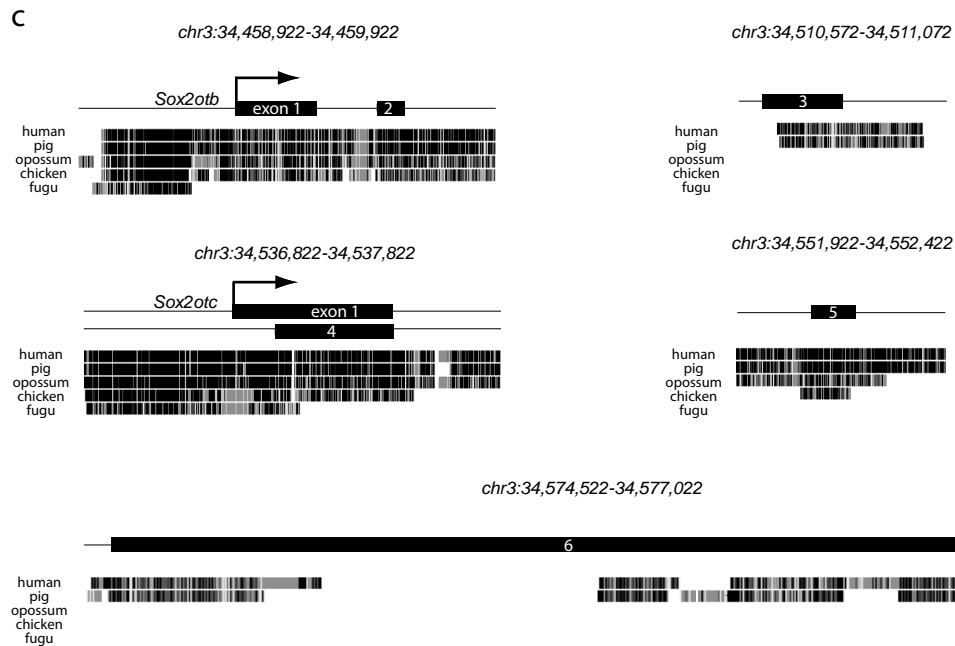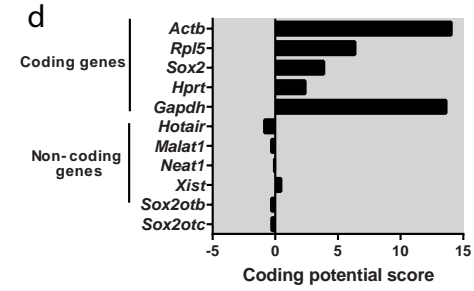

**e**

**Sox2otb**

| No. of ATG from 5'end | Reliability | Frame | Kozak sequence | Start (bp) | End (bp) | ORF length (aa) | Sequence                                                                                                |
|-----------------------|-------------|-------|----------------|------------|----------|-----------------|---------------------------------------------------------------------------------------------------------|
| 6                     | 0.23        | 1     | IXXATGG        | 382        | 699      | 106             | MEKEGGSSASFNFSFQVRSQPAWADERLRLSHVOCFLPANQATATROHPDLAWSFRVQACSPKSENLCSWYTKRSGATDLOKALNSEIEPRNCTFLKRLRESG |
| 13                    | 0.13        | 2     | AXXATGI        | 929        | 1096     | 56              | MYLITQOQOLELYPSVALNKRDRDTRDTRDAGRQADRGRDRGTETEKGRNDS                                                    |
| 23                    | 0.09        | 3     | IXXATGI        | 1824       | 1964     | 47              | MCILSORACGDYKTVKIGHSRDHLRDLRLTLCHFQVTFGVAVIIF                                                           |
| 1                     | 0.08        | 2     | cXXATGG        | 122        | 238      | 39              | MRKVPGLVCWDRHPQELWAVPSPKPRFLQNSGHPVDE                                                                   |
| 15                    | 0.06        | 1     | IXXATGc        | 1180       | 1221     | 24              | HPVVSALGKQGESLTKVSLDHW                                                                                  |

**Sox2otc**

| No. of ATG from 5'end | Reliability | Frame | Kozak sequence | Start (bp) | End (bp) | ORF length (aa) | Sequence                                                                                                |
|-----------------------|-------------|-------|----------------|------------|----------|-----------------|---------------------------------------------------------------------------------------------------------|
| 3                     | 0.23        | 1     | IXXATGG        | 232        | 549      | 106             | MEKEGGSSASFNFSFQVRSQPAWADERLRLSHVOCFLPANQATATROHPDLAWSFRVQACSPKSENLCSWYTKRSGATDLOKALNSEIEPRNCTFLKRLRESG |
| 10                    | 0.13        | 2     | AXXATGI        | 779        | 946      | 56              | MYLITQOQOLELYPSVALNKRDRDTRDTRDAGRQADRGRDRGTETEKGRNDS                                                    |
| 20                    | 0.09        | 3     | IXXATGI        | 1674       | 1814     | 47              | MCILSORACGDYKTVKIGHSRDHLRDLRLTLCHFQVTFGVAVIIF                                                           |
| 12                    | 0.06        | 1     | IXXATGc        | 1000       | 1071     | 24              | HPVVSALGKQGESLTKVSLDHW                                                                                  |
| 11                    | 0.06        | 3     | GXXATGc        | 939        | 986      | 16              | MIPELFLKFKIQIN                                                                                          |

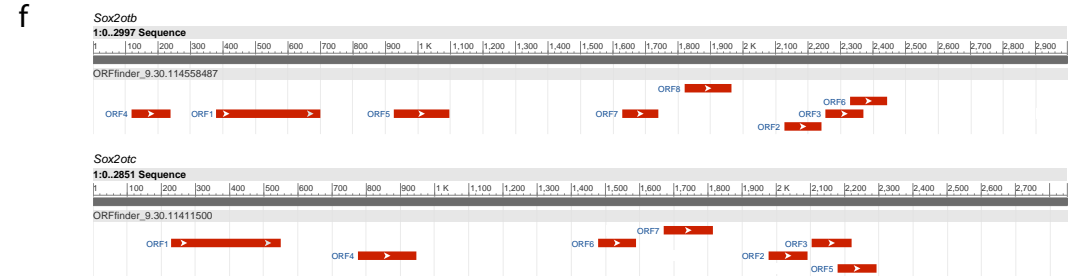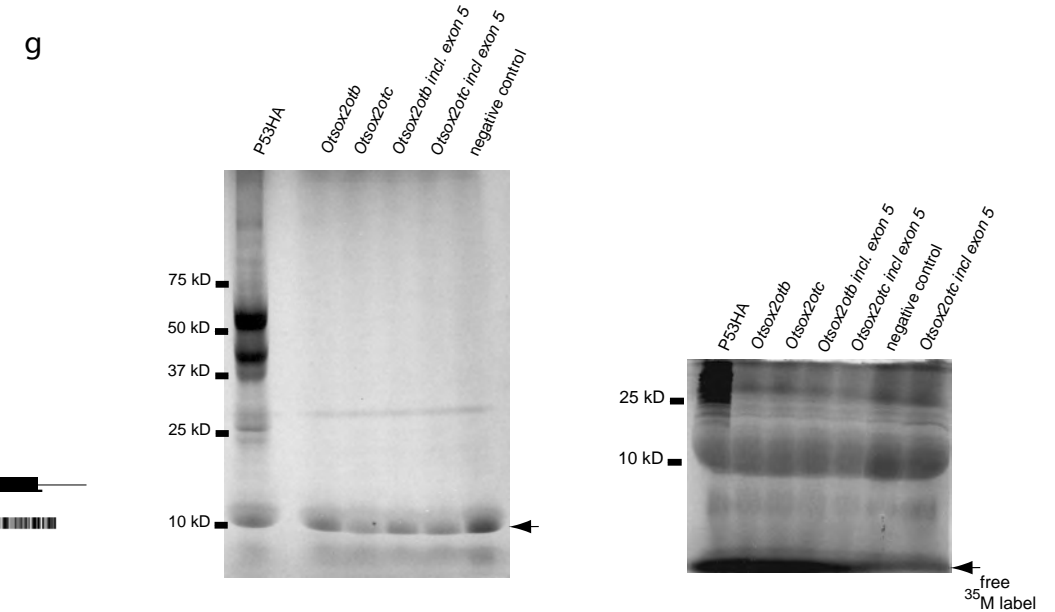

## Supplementary Fig. S1.

**Characterization of Soxot transcripts.** (a) Genome browser view of *Sox2otb* and *Sox2otc*. Sequences that we isolated from primary mouse neurospheres were aligned to the mouse genome (Mm9). Multiple *Sox2ot* splice variants were identified. In addition, RLM-RACE identified two transcription start sites (TSSs) that are further upstream than previously identified TSSs. (b) Genome browser view of *Sox2dot*, for which we could not isolate 5' capped RNA sequences. (c) Multiple sequence alignments showing the conservation of the genomic sequence surrounding the exons of *Sox2otb* and *Sox2otc* from human to *fugu*. *Sox2ot* promoter sequences have been more strongly conserved. The grayscale of the blocks indicates the conservation strength. (d) Sequence analysis of all splice variants did not show any coding potential using the coding potential calculator (CPC). (e) Predicted ATG protein starts for *Sox2otb* (top) and *Sox2otc* (bottom) using a translation initiation prediction program (<http://atgpr.dbcls.jp/>). Specificity and sensitivity of this program crossed at 46% at a ATGpr score threshold of 0.33 indicating that translation initiation of *Sox2ot* transcripts is rather unlikely. (f) Possible ORFs in *Sox2otb* and *Sox2otc* using NCBI's ORFfinder. (g) In *vitro* translation of the transcripts (marked # in (a)) did not reveal any polypeptide generation on a 8-20% SDS polyacrylamide gradient gel (left) or a 20% SDS polyacrylamide gel (right).

Supplementary Figure S2

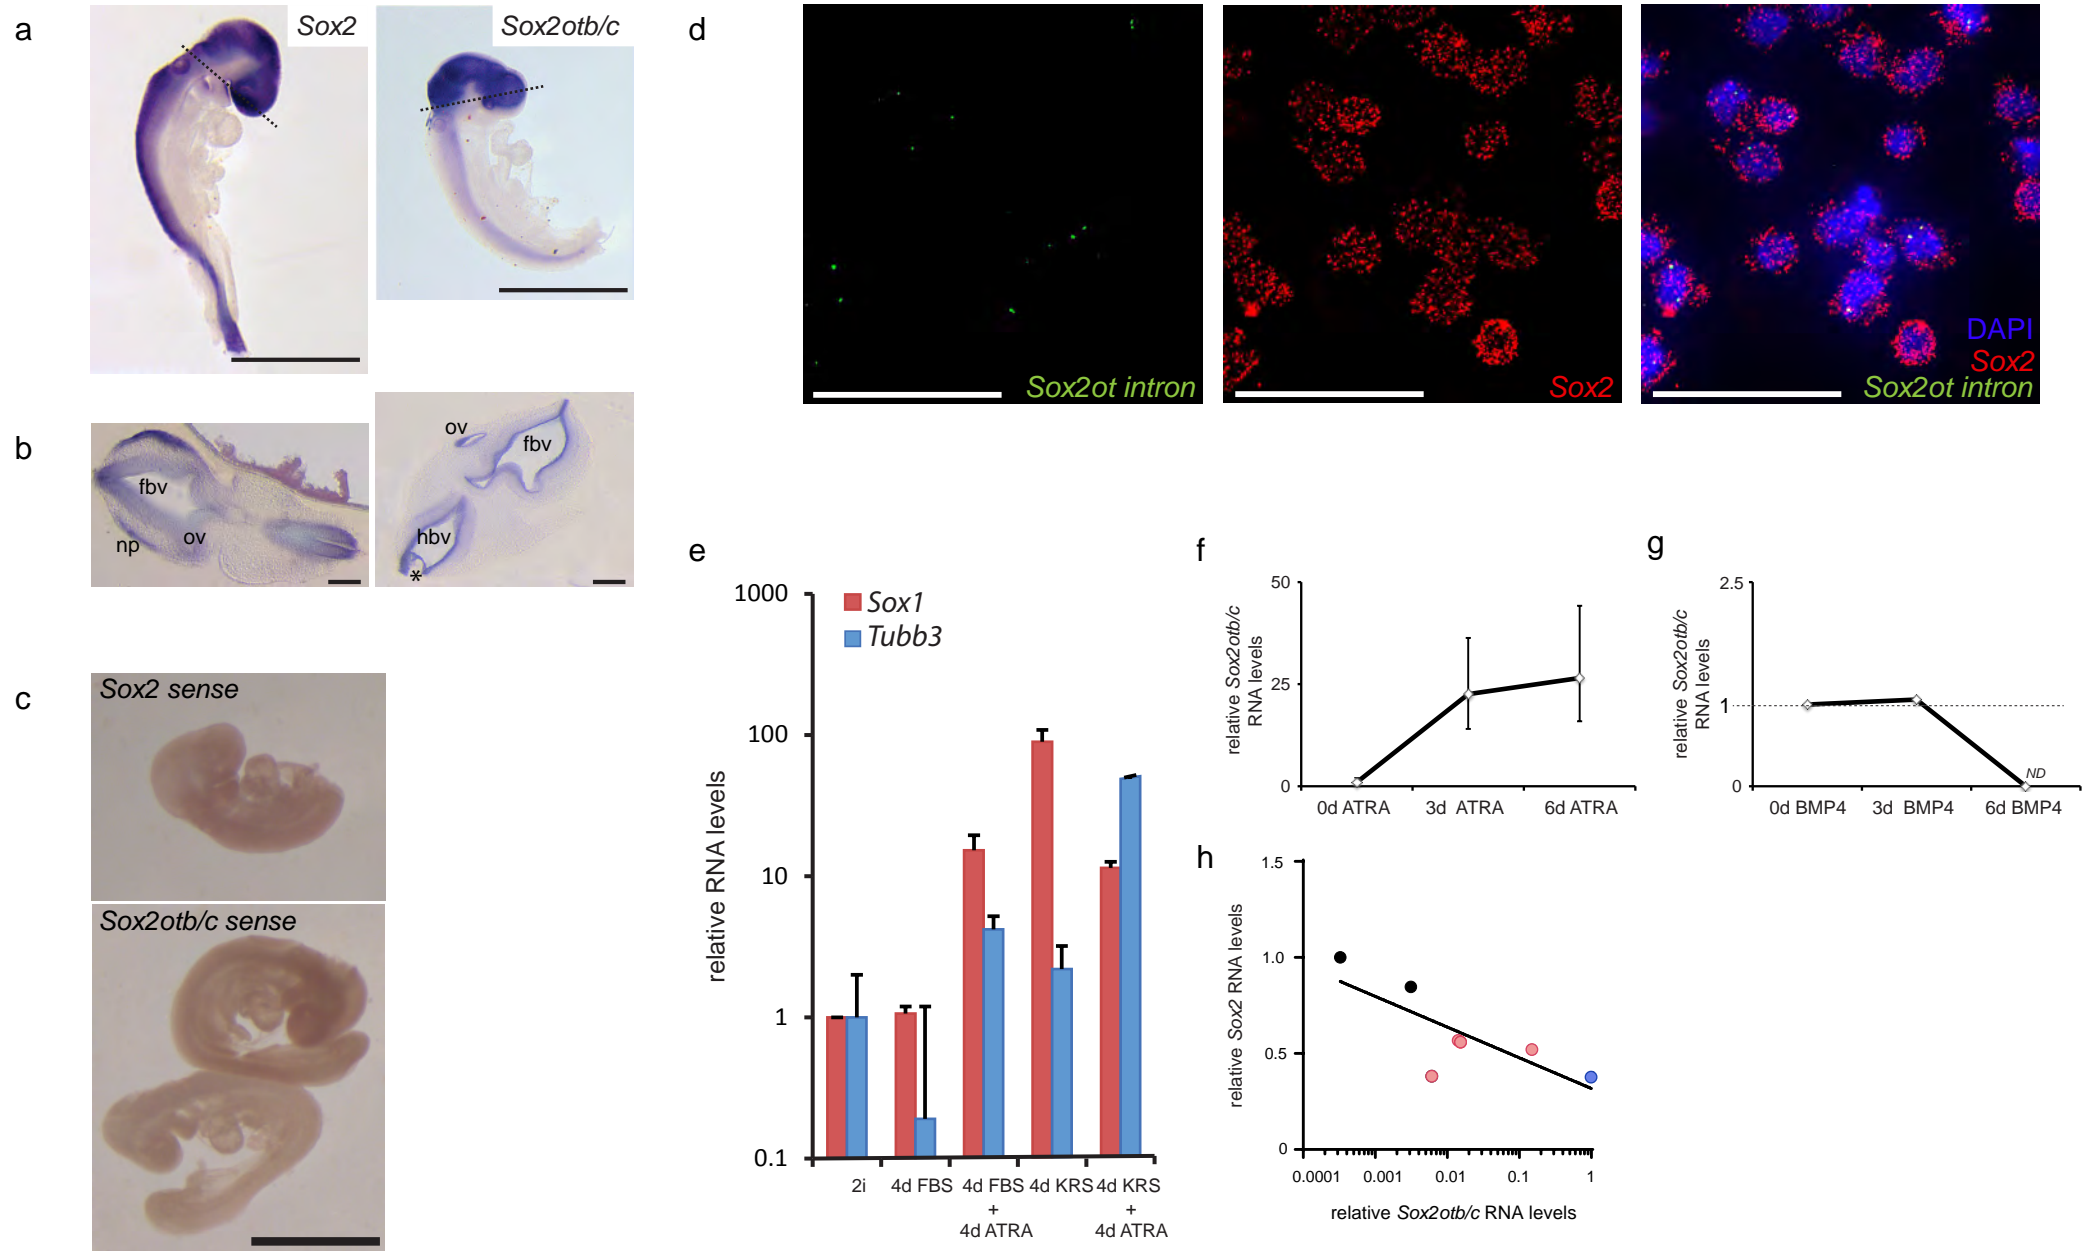

## Supplementary Fig. S2.

**Sox2ot RNA expression is correlated with Sox2 RNA expression.** (a) Wholemount RNA ISH of E9.25 mouse embryos using antisense *Sox2* and *Sox2ot b/c* RNA probes. Scale bar represents 1 mm. Dotted line indicates the position and plane of the transverse sections depicted in b. Scale bar represents 100  $\mu\text{m}$ . (b) transverse sections of whole mounts depicted in a. op, olfactory placode; opv, optic vesicle; bv, brain vesicle; fbv, forebrain vesicle; hbv, hindbrain vesicle; \* indicates the location where the brain vesicle was punctured to eliminate probe trapping. (c) Whole mount RNA ISH of E9.25 mouse embryos using *Sox2* and *Sox2ot b/c* sense control RNA probes. Scale bar represents 1 mm. (d) smFISH with *Sox2ot* intron 2 probe on day 4 of N2B27 guided monolayer differentiation of wildtype mouse ESCs into the neural lineage. *Sox2ot* signal in green. *Sox2* signal in red. Nuclei were visualized using DAPI. Scale bar represents 50  $\mu\text{M}$ . (e) Induction of *Sox1* is accompanied by upregulation of the early neuronal marker *Tubb3* as demonstrated by qRT-PCR analysis. Averages are from one representative differentiation experiment using two independent mouse ESC lines. Cells were differentiated as embryoid bodies in the presence of fetal bovine serum (FBS) or knockout replacement serum (KRS) and after 4 days ATRA was added. SDs are shown. Raw qRT-PCR values were normalized against  $\beta\text{-Actin}$ , and results are represented as fold induction to the levels of *Sox1* and *Tubb3* prior to differentiation (d0 in 2i medium). (f and g) Monolayer differentiation of mouse ESCs. (f) *Sox2otbc* expression is induced during neural differentiation in N2B27 + ATRA medium. (g) However not during BMP4-mediated mesendoderm differentiation of mESCs. Averages + SD are from one representative differentiation experiment using two independent mouse ESC lines. Raw qRT-PCR values were normalized against  $\beta\text{-Actin}$ , and results are represented as fold induction to the levels of *Sox2otb/c* prior to differentiation (d0). (h) non-linear regression plot of relative *Sox2* and *Sox2ot* levels showing a negative correlation. Black circles (mouse ESC lines), red circles (mouse NS lines), light red circle (NPC enriched differentiation), and blue circle (primary NPCs).

Supplementary Figure S3

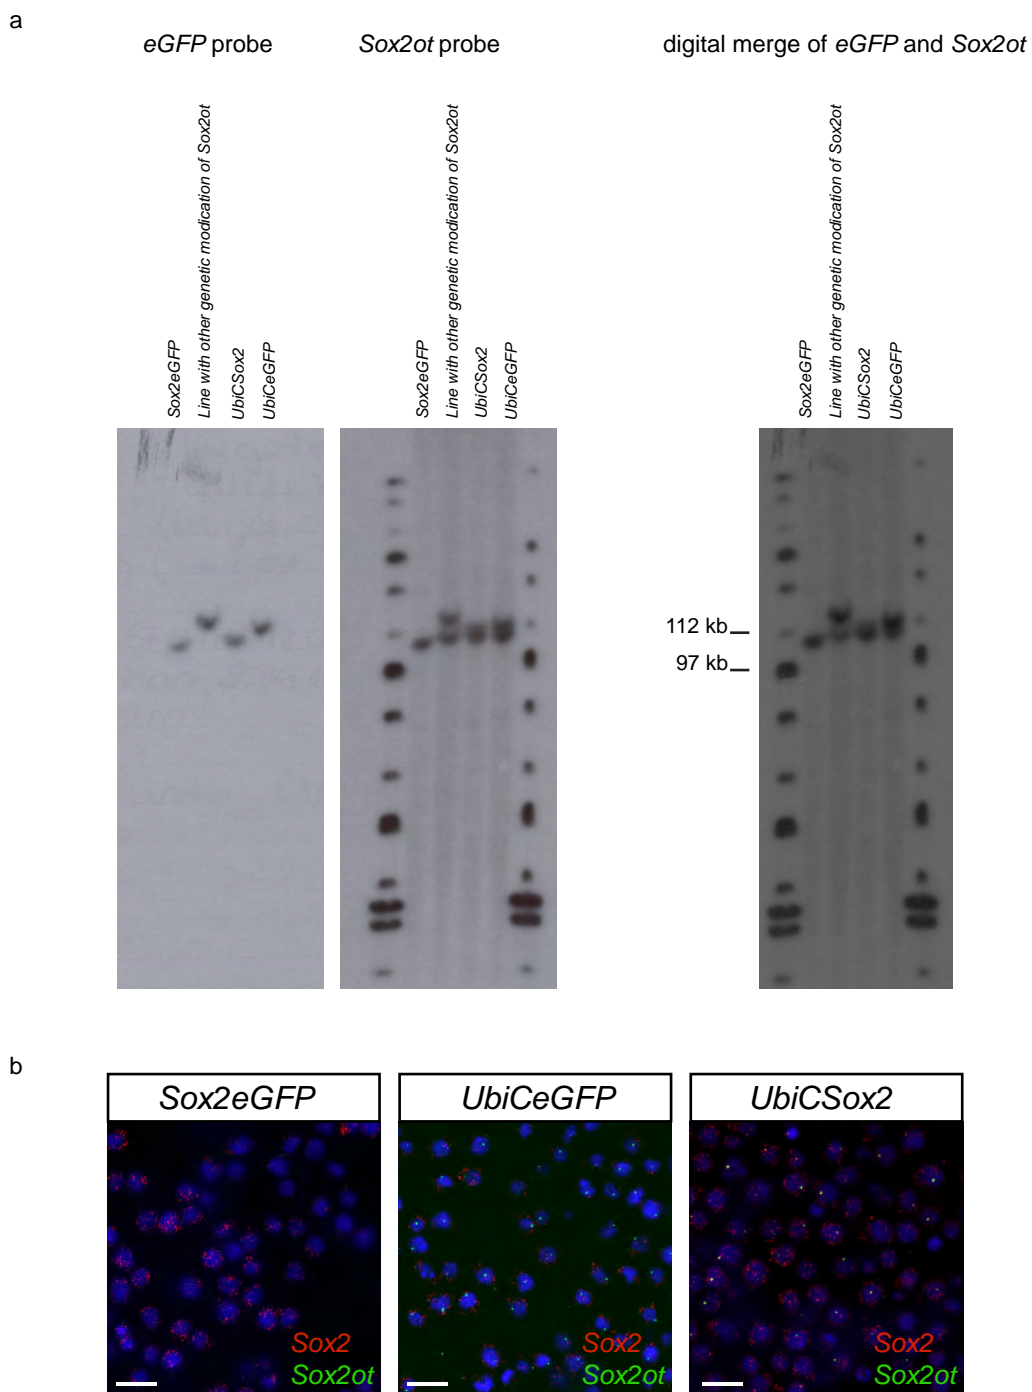

**Analysis of Sox2ot knockin Sox2eGFP ESCs.** Original PFGE Southern blots belonging to Fig. 2d and 2e showing allele specific targeting of Sox2eGFP ESCs (a). Left panel eGFP probe, middle panel Sox2ot probe, right panel overlay of both blots. (b) Sox2 (red) and Sox2ot (green) smFISH results in Sox2eGFP (left), UbiCeGFP (middle) and UbiCSox2 ESCs (right). Nuclei are visualized by DAPI. Scale bar represents 20  $\mu$ M.

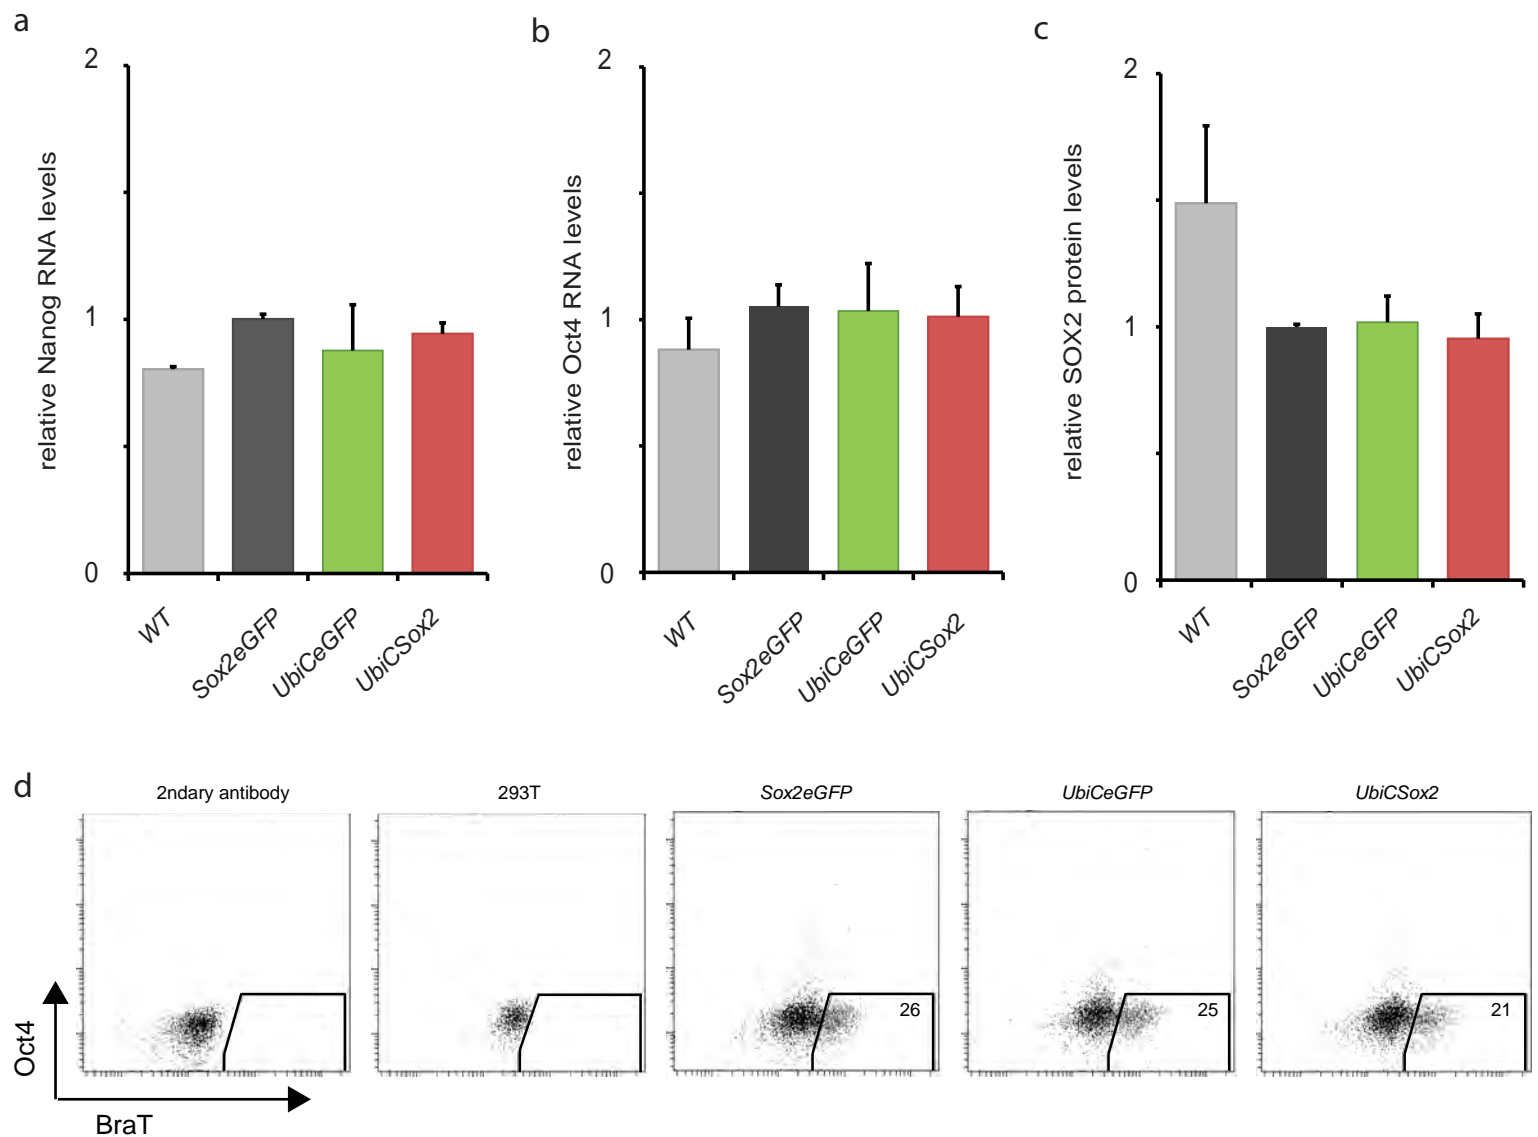

**Sox2otb overexpressing mouse ESCs are very similar to the parental Sox2eGFP mouse ESCs.** Comparing relative RNA levels of *Nanog* (a) or *Oct4* (b) in WT, Sox2eGFP, *UbiCeGFP* and *UbiCSox2* ESCs. Values (+SD) are from three independent experiments of two mESC lines per genotype. (c) The mean SOX2 protein levels in WT, Sox2eGFP, *UbiCeGFP* and *UbiCSox2* ESCs as measured by flow cytometry. (d) Flow cytometric analysis of Brachyury positive cells upon CHIR99021-mediated mesendodermal differentiation of *Sox2eGFP*, *UbiCeGFP* and *UbiCSox2* cell lines at day 3.5 of differentiation. Controls are secondary antibody only and 293T cells which are negative for Brachyury.

# Supplementary Figure S5

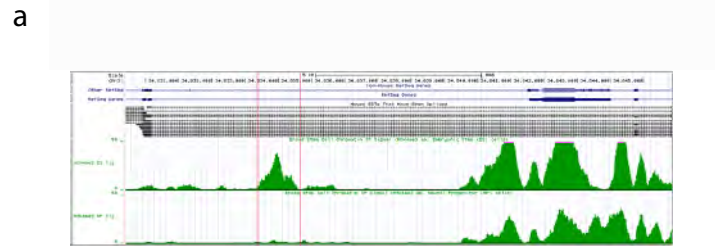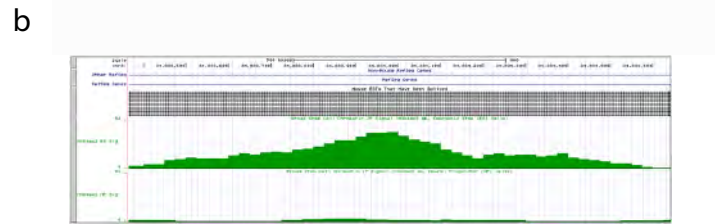

Database: mm8 Table: broadStemChIPSignalH3K4Es

| Chrom | Data start | Data end | # of Data values | Each data value spans # bases | Bases covered  | Minimum | Maximum | Range   | Mean   | Variance | Standard deviation |
|-------|------------|----------|------------------|-------------------------------|----------------|---------|---------|---------|--------|----------|--------------------|
| chr3  | 34833376   | 34834625 | 50               | 25                            | 1,250 (97.96%) | 0       | 38,2323 | 38,2323 | 16,332 | 96,1649  | 9,80637            |

Database: mm8 Table: broadStemChIPSignalH3K4Np

| Chrom | Data start | Data end | # of Data values | Each data value spans # bases | Bases covered  | Minimum | Maximum | Range   | Mean    | Variance | Standard deviation |
|-------|------------|----------|------------------|-------------------------------|----------------|---------|---------|---------|---------|----------|--------------------|
| chr3  | 34833376   | 34834625 | 50               | 25                            | 1,250 (97.96%) | 0       | 3,16142 | 3,16142 | 1,24157 | 1,89045  | 1,04425            |

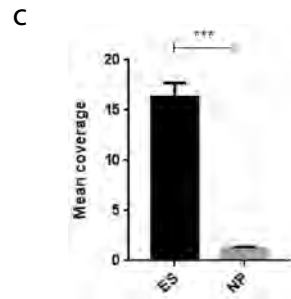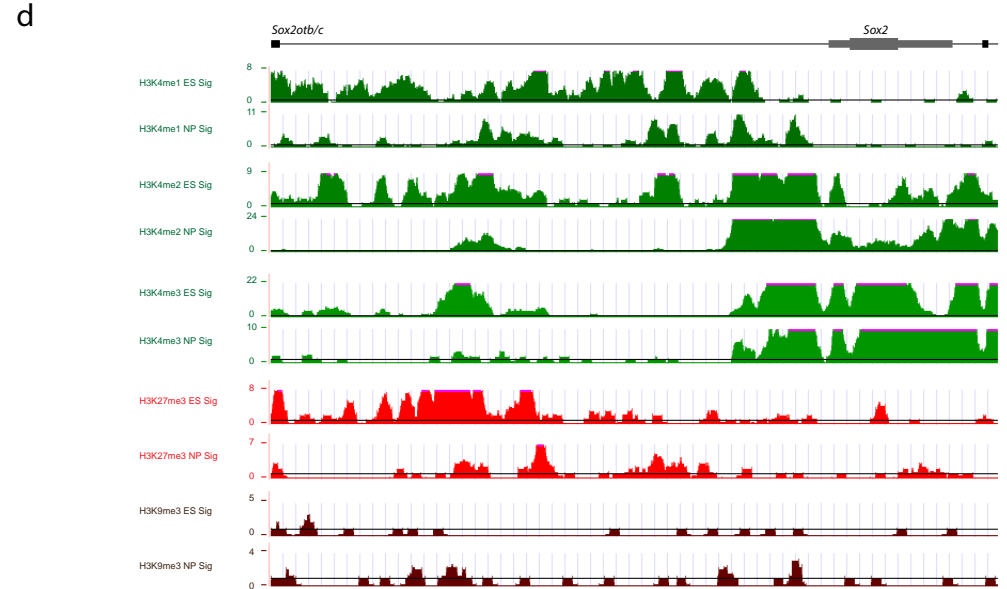

**Assessing the differences in histone modifications between ESCs and NPCs.** (a) First step: visual assessment of the differences, here depicted as density signal, of H3K4me3 ChIP-seq reads aligning to the region mouse chr 3: chr3:34,829,397-34,845,851 (mm8). (b) The mean H3K4me3 coverage and standard deviation of 25-basepair regions were extracted from UCSC over a 1250 bp region resulting in 50 data values. (c) The mean H3K4me3 coverage  $\pm$  SEM for this 1250 bp region is depicted for embryonic stem cells (ES) and neural progenitor cells (NP). Students T-test was used to determine the differences. (d) Genome browser view of mouse chr3: 34,830,000-34,845,000 (mm8) depicting H3K4me1, H3K4me2, H3K4me3, H3K9me3 and H3K27me3 density peaks in chromatin of mouse ESCs and ESC-derived NPCs (Broad ChIPseq data).



Messemaker\_Supplementary Table S1

| <b>primer name</b>                           | <b>Sequence</b>                   |
|----------------------------------------------|-----------------------------------|
| <b>Probes for DNA and RNA hybridisations</b> |                                   |
| eGFP2.1for                                   | 5'-GAGCTGGACGGCGACGTAAACG-3'      |
| eGFP2.1rev                                   | 5'-CGCTTCTCGTTGGGTCTTTGCT-3'      |
| mSox2otbforQ                                 | 5'-TTGATCCTCTGATGGGGAAG-3'        |
| mSox2otbrev                                  | 5'-TTACACCAGCCTCCAAGACC-3'        |
| mSox2OTbforQ                                 | 5'-CTCGTCAGCCCAAGCTGGATC-3'       |
| mSox2OTbcrevQ                                | 5'-CTCGTCAGCCCAAGCTGGATC-3'       |
| mSox2for                                     | 5'-GTTCTAGTGGTACGTTAGGCCTTC-3'    |
| mSox2rev                                     | 5'-GGACATTTGATTGCCATGTTTATCTCG-3' |
| Sox2otTargetProbefor                         | 5'-GTGGTGGACAGTCACAGGTC-3'        |
| Sox2otTargetProberev                         | 5'-GTCAAGGCTTATGGGAATCG-3'        |
| <b>qPCR</b>                                  |                                   |
| mSox2OTbforQ                                 | 5'-GACGCTGATGGGAGAGACTGGTC-3'     |
| mSox2OTbcrevQ                                | 5'-CTCGTCAGCCCAAGCTGGATC-3'       |
| mSox1UTRforQ                                 | 5'-CCGAGCGCCAGGTGACATC-3'         |
| mSox1UTRrevQ                                 | 5'-GTTGGCATCGCCTCGCTGG-3'         |
| mSox2UTRforQ                                 | 5'-GTTCTAGTGGTACGTTAGGCGCTTC-3'   |
| mSox2UTRrevQ                                 | 5'-GGACATTTGATTGCCATGTTTATCTCG-3' |
| bActinforQ                                   | 5'-TCGGTGAGCAGCACAGGGTG-3'        |
| bActinrevQ                                   | 5'-CGCCCTAGGCACCAGGGTGTG-3'       |
| mMyl6revQ                                    | 5'-CTCGGCGTTGGTAGGGTTCTG-3'       |
| mMyl6forQ                                    | 5'-CAAGGAGGCTTTCCAGCTGTTTG-3'     |
| mTubb3forQ                                   | 5'-TGGACAGTGTTCCGGTCTGG-3'        |
| mTubb3revQ                                   | 5'-CCTCCGTATAGTGCCCTTTGG-3'       |
| mBra(T)revQ                                  | 5'-GTCCAGCAAGAAAGAGTACATGGC-3'    |
| mBra(T)forQ                                  | 5'-GCTTCAAGGAGCTAACTAACGAG-3'     |
| Neat1forQ                                    | 5'-ACTGGGTGGTTGAGTGGCAA-3'        |
| Neat1revQ                                    | 5'-TCTGAGCAGGGCTGTGAACC-3'        |
| 18SforQ                                      | 5'-CTCAACACGGGAAACCTCAC-3'        |
| 18SrevQ                                      | 5'-CGCTCCACCAACTAAGAACG-3'        |
| <b>ChIP</b>                                  |                                   |
| Sox2otH3K4me3for                             | 5'- GAGGGTGTGTTTATTCCTGCTCCAG-3'  |
| Sox2otH3K4me3rev                             | 5'- GCAACGGCTCCTGAATGTCCATC-3'    |
| mMyl6revQ                                    | 5'- CTCGGCGTTGGTAGGGTTCTG-3'      |
| mMyl6forQ                                    | 5'- CAAGGAGGCTTTCCAGCTGTTTG-3'    |
| <b>3C</b>                                    |                                   |
| SRR1                                         | 5'-TTCGCCACCGTTGTCCACATC-3'       |
| IntergenicNegF                               | 5'-GCAGTCTGTGCGTACCATTCTG-3'      |
| SCR-P300boxDD                                | 5'-TCCAGGCTAGAGGACAGTTTGTATAAT-3' |
| Dppa2intV                                    | 5 AACGACTTGATTGTTCTTCCAGGT'-3     |
| Dppa2baitZ                                   | 5'-CCTCTGACTAAGGTACCCACACT-3'     |

## Supplementary Methods Information

### ChIP-seq data processing as performed and described by Mikkelsen et al. 2007

(*Genome-wide maps of chromatin state in pluripotent and lineage-committed cells. Nature. 2007 448:553-60*)

Sequence reads from each IP experiment were aligned to the mouse reference genome (mm8) using the ARACHNE computational pipeline. First, a table was pre-computed to associate all possible 12-mers with all of their occurrences in the genome. For each ChIP-Seq read (forward and reverse complement orientation), each potential start point was then found and the number of mismatches in the corresponding gap-free alignment was computed. All uniquely aligned reads (defined as the second to best alignment having >2 mismatches more than the best alignment, and the total mismatch count being  $\leq 6$ ) were kept. If multiple reads aligned to the same starting position, only one were kept. Fragment densities were computed by counting the number of reads (extended to 300 bp) overlapping each position in the genome (at 25 bp resolution). Non-unique positions in the reference genome were pre-computed by aligning every 27-mer in the genome to the whole genome and masking positions that did not meet the uniqueness criteria defined above.
